# Supplementary material for: Cross-cultural adaptation and measurement properties of generic and cancer-related patient-reported outcome measures (PROMs) for use with cancer patients in Brazil: a systematic review
Source: Springer Nature journal article supplement (doi:10.1007/s11136-017-1703-5), 2017-09-08
Supplement: MOESM1 [file 15033984]

**Title:** Cross-cultural adaptation and measurement properties of generic and cancer-related patient-reported outcome measures (PROMs) for use with cancer patients in Brazil: a systematic review

**Journal name:** Quality of Life Research

**Authors:** Carlos Augusto Albach<sup>a</sup>, Richard Wagland, Katherine J Hunt

<sup>a</sup> Corresponding author. MSc candidate, Clinical Leadership in Cancer, Palliative and End of life Care. Faculty of Health Sciences, University of Southampton, University Road, Southampton, Hampshire SO17 1BJ, United Kingdom.

E-mail: caa1n14@soton.ac.uk

Tel: +44(0)23 8059 3131

#### MEDLINE search strategy (OVID)

---

- 1 Questionnaire\*.ti,ab.
  - 2 Questionnaire design\*.ti,ab.
  - 3 Design, questionnaire\*.mp. [mp=title, abstract, original title, name of substance word, subject heading word, protocol supplementary concept, rare disease supplementary concept, unique identifier]
  - 4 Designs, questionnaire.mp. [mp=title, abstract, original title, name of substance word, subject heading word, protocol supplementary concept, rare disease supplementary concept, unique identifier]
  - 5 Instrument\*.ti,ab.
  - 6 Scale\*.ti,ab.
  - 7 Index\*.ti,ab.
  - 8 Score\*.ti,ab.
  - 9 Inventory.ti,ab.
  - 10 Evaluat\*.ti,ab.
  - 11 Assess\*.ti,ab.
  - 12 Survey\*.mp. [mp=title, abstract, original title, name of substance word, subject heading word, protocol supplementary concept, rare disease supplementary concept, unique identifier]
  - 13 Measure\*.mp. [mp=title, abstract, original title, name of substance word, subject heading word, protocol supplementary concept, rare disease supplementary concept, unique identifier]
  - 14 Tool\*.ti,ab.
  - 15 Outcome\*.ti,ab.
  - 16 Self-report\*.mp. [mp=title, abstract, original title, name of substance word, subject heading word, protocol supplementary concept, rare disease supplementary concept, unique identifier]
  - 17 Report, self.mp. [mp=title, abstract, original title, name of substance word, subject heading word, protocol supplementary concept, rare disease supplementary concept, unique identifier]
  - 18 Reports, self.mp. [mp=title, abstract, original title, name of substance word, subject heading word, protocol supplementary concept, rare disease supplementary concept, unique identifier]
  - 19 Patient-reported.mp. [mp=title, abstract, original title, name of substance word, subject heading word, protocol supplementary concept, rare disease supplementary concept, unique identifier]
  - 20 Report, patient.mp. [mp=title, abstract, original title, name of substance word, subject heading word, protocol supplementary concept, rare disease supplementary concept, unique identifier]
-

MEDLINE search strategy (OVID)

---

- 21 Reports, patient.mp. [mp=title, abstract, original title, name of substance word, subject heading word, protocol supplementary concept, rare disease supplementary concept, unique identifier]
  - 22 Patient centered.ti,ab.
  - 23 Patient centred.ti,ab.
  - 24 Person-reported.ti,ab.
  - 25 Quality of life.mp. [mp=title, abstract, original title, name of substance word, subject heading word, protocol supplementary concept, rare disease supplementary concept, unique identifier]
  - 26 Quality measure\*.ti,ab.
  - 27 Quality assessment\*.ti,ab.
  - 28 Value of life.mp. [mp=title, abstract, original title, name of substance word, subject heading word, protocol supplementary concept, rare disease supplementary concept, unique identifier]
  - 29 Health status.mp. [mp=title, abstract, original title, name of substance word, subject heading word, protocol supplementary concept, rare disease supplementary concept, unique identifier]
  - 30 Functional status.mp. [mp=title, abstract, original title, name of substance word, subject heading word, protocol supplementary concept, rare disease supplementary concept, unique identifier]
  - 31 QOL.ti,ab.
  - 32 HRQOL.ti,ab.
  - 33 HRQL.ti,ab.
  - 34 PRO.ti,ab.
  - 35 PROM.ti,ab.
  - 36 1 or 2 or 3 or 4 or 5 or 6 or 7 or 8 or 9 or 10 or 11 or 12 or 13 or 14 or 15 or 16 or 17 or 18 or 19 or 20 or 21 or 22 or 23 or 24 or 25 or 26 or 27 or 28 or 29 or 30 or 31 or 32 or 33 or 34 or 35
  - 37 Oncology.mp. [mp=title, abstract, original title, name of substance word, subject heading word, protocol supplementary concept, rare disease supplementary concept, unique identifier]
  - 38 Cancer.mp. [mp=title, abstract, original title, name of substance word, subject heading word, protocol supplementary concept, rare disease supplementary concept, unique identifier]
  - 39 Palliative care.mp. [mp=title, abstract, original title, name of substance word, subject heading word, protocol supplementary concept, rare disease supplementary concept, unique identifier]
  - 40 Palliative.ti,ab.
  - 41 Terminal care.mp. [mp=title, abstract, original title, name of substance word, subject heading word, protocol supplementary concept, rare disease supplementary concept, unique identifier]
  - 42 Terminal\*.ti,ab.
  - 43 Tumor\*.ti,ab.
  - 44 Neoplasms.mp. [mp=title, abstract, original title, name of substance word, subject heading word, protocol supplementary concept, rare disease supplementary concept, unique identifier]
  - 45 Carcinoma.mp. [mp=title, abstract, original title, name of substance word, subject heading word, protocol supplementary concept, rare disease supplementary concept, unique identifier]
  - 46 Life support\*.ti,ab.
  - 47 EOL\*.ti,ab.
-

MEDLINE search strategy (OVID)

---

48 37 or 38 or 39 or 40 or 41 or 42 or 43 or 44 or 45 or 46 or 47  
49 (animals not (humans and animals)).sh.  
50 48 not 49  
51 36 and 50  
52 Valid\*.ti,ab.  
53 Translat\*.ti,ab.  
54 Cross-cultural\*.ti,ab.  
55 Cross-cultural adapt\*.ti,ab.  
56 Version\*.ti,ab.  
57 Language.mp. [mp=title, abstract, original title, name of substance word, subject heading word, protocol  
supplementary concept, rare disease supplementary concept, unique identifier]  
58 52 or 53 or 54 or 55 or 56 or 57  
59 Brazil\*.mp. [mp=title, abstract, original title, name of substance word, subject heading word, protocol  
supplementary concept, rare disease supplementary concept, unique identifier]  
60 Portuguese\*.ti,ab.  
61 59 or 60  
62 51 and 58 and 61

---

Hits (31<sup>st</sup> of March 2016): 263
